# Supplementary material for: Punicalagin, a pomegranate compound, induces apoptosis and autophagy in acute leukemia
Source: PeerJ. 2021 Nov 2;9:e12303. doi: 10.7717/peerj.12303 (PMC8570173; doi:10.7717/peerj.12303)
Supplement: Supplemental Information 1 [file peerj-09-12303-s001.xlsx]

## Sheet: MTS assay
	% cell viability
	24 h NB4			24 h MOLT-4			48 h NB4			48 h MOLT-4			24 h PBMC			48 h PBMC
Punicalagin (ug/ml)	I	II	III	I	II	III	I	II	III	I	II	III	I	II	III	I	II	III
0	100	100	100	100	100	100	100	100	100	100	100	100
25	79.2708	78.1705	75.0594	80.0249	88.9619	90.2846	76.6764	80.9624	79.5381	76.5672	82.4994	76.9009
50	78.1014	36.729	47.5534	58.5786	87.0434	73.7274	50.7094	31.5962	61.8958	57.5758	73.0044	54.0905
75	43.9807	14.2065	34.8694	28.0798	52.1682	42.2277	39.2809	14.8122	37.7551	23.1552	41.5406	38.1777
100	21.3942	13.7907	16.9351	15.4115	17.2405	16.9251	13.7609	7.98122	4.21286	17.511	12.1946	12.7996
Daunorubicin (ug/ml)
0	100	100	100	100	100	100	100	100	100	100	100	100
0.25	88.3517	70.8766	72.6909	85.664	82.2116	86.6836	66.3887	46.7942	44.6526	65.9659	63.0632	54.0891
0.5	59.6693	42.8882	41.4232	53.6793	50.1246	55.6044	35.4576	15.0621	16.5156	35.3584	14.7582	16.9839
0.75	35.4459	33.0838	31.2677	32.2486	48.6064	41.5239	16.4384	16.3037	15.0655	13.3487	18.6647	15.959
1	32.4399	29.4856	29.8775	25.5937	36.7777	34.8309	14.87	14.6754	14.7029	12.0244	15.2129	15.5616
Synergistic effect
Control	100	100	100	100	100	100	100	100	100	100	100	100	100	100	100	100	100	100
IC50 PUN	70.5926	47.3706	50.0729	67.2097	51.16	44.4833	46.4444	66.8422	45.0439	46.5138	64.6278	64.6278	88.5736	80.8159	86.3426	84.7796	92.686	93.291
IC50 Dauno	45.3915	39.9293	59.6693	57.7648	49.2103	52.5672	45.9261	57.3161	54.8334	54.5646	58.6768	49.6575	90.9509	87.817	71.9907	83.6777	99.6847	82.8649
PUN+Dauno	24.8993	33.8765	30.1895	37.173	23.3988	31.4398	20.419	19.5743	20.7848	28.4021	28.1887	19.9384	62.5	67.5303	60.2623	67.6997	76.0404	58.8395

## Sheet: Flow cytometry
	AnnexinV/FITC-PI						LC3-II MFI
PUN conc (ug/ml)	NB4			MOLT-4			NB4			MOLT-4
0	6.5	9.1	8	11	10.4	10	3370	3304	3075	2504	2721	3099
55	43.8	54.5	45.6	40.2	40.6	40.3	6586	6698	6951	5865	5754	5611

## Sheet: RT-qPCR
	2^DDCT
	Control	PUN-treated NB4			PUN-treated MOLT4
CASP3	1	1.43311	1.1622	1.48324	1.19108	1.31319	1.2216
CASP8	1	1.44877	1.40277	1.42736	1.22565	1.34888	1.40605
CASP9	1	1.42608	1.68301	1.66754	1.38148	1.48885	1.53901
BCL2	1	0.719326	0.556144	0.839142	0.71751	0.50287	0.704598
BAX	1	1.18296	1.12107	1.15514	1.10446	1.10178	1.10496
mTOR	1	0.659059	0.433896	0.524154	0.788812	0.65667	0.710067
ULK1	1	1.84426	1.24655	1.5138	2.13343	3.02987	1.55081
